# Supplementary material
Source: MDPI journal article supplement (https://www.mdpi.com/2227-9040/10/4/148)
Supplement: s1 [file s1]

# Supplementary Material

## Composite Electrodes Based on Carbon Materials Decorated with Hg Nanoparticles for the Simultaneous Detection of Cd(II), Pb(II) and Cu(II)

Laia L. Fernández <sup>1,2</sup>, Julio Bastos-Arrieta <sup>3,4</sup>, Cristina Palet <sup>1</sup> and Mireia Baeza <sup>2,\*</sup>

<sup>1</sup> GTS Research Group, Department of Chemistry, Faculty of Science, Edifici C-Nord, Universitat Autònoma de Barcelona, Carrer dels Til·lers, 08193 Bellaterra, Spain; [laia.lopez@uab.cat](mailto:laia.lopez@uab.cat) (L.L.F); [cristina.palet@uab.cat](mailto:cristina.palet@uab.cat) (C.P)

<sup>2</sup> GENOCOV Research Group, Department of Chemistry, Faculty of Science, Edifici C-Nord, Universitat Autònoma de Barcelona, Carrer dels Til·lers 08193, Bellaterra, Spain; [mariadelmar.baeza@uab.cat](mailto:mariadelmar.baeza@uab.cat) (M.B.)

<sup>3</sup> Grup d'Electroanàlisi, Department of Chemical Engineering and Analytical Chemistry, Universitat de Barcelona, Carrer Martí i Franqués 1-11, 08028, Barcelona, Spain; [julio.bastos@ub.edu](mailto:julio.bastos@ub.edu) (J.B.-A)

\* Correspondence: [mariadelmar.baeza@uab.cat](mailto:mariadelmar.baeza@uab.cat) (M.B.)

**Table S1:** Response of some modified electrodes and other analytical techniques.

| Electrode                                            | DL                                                                                                                                  | Linear Range                                                                                                 | Sensitivity                                                                                                                                                                                                             | Ref  |
|------------------------------------------------------|-------------------------------------------------------------------------------------------------------------------------------------|--------------------------------------------------------------------------------------------------------------|-------------------------------------------------------------------------------------------------------------------------------------------------------------------------------------------------------------------------|------|
| BiF/N/IL/G/SPCE                                      | 0.09 ng·mL <sup>-1</sup> Zn <sup>2+</sup><br>0.06 ng·mL <sup>-1</sup> Cd <sup>2+</sup><br>0.08 ng·mL <sup>-1</sup> Pb <sup>2+</sup> | 0.1-100.0 ng·mL <sup>-1</sup>                                                                                | Cd <sup>2+</sup> : 0.5189 μA·<br>(ng·mL <sup>-1</sup> ) <sup>-1</sup><br>Pb <sup>2+</sup> : 0.3508 μA·<br>(ng·mL <sup>-1</sup> ) <sup>-1</sup><br>Zn <sup>2+</sup> : 0.2137 μA·<br>(ng·mL <sup>-1</sup> ) <sup>-1</sup> | [21] |
| Ultra trace graphite rotating disk with a film of Hg | 0.8 ng·mL <sup>-1</sup> Cd <sup>2+</sup><br>0.88 ng·mL <sup>-1</sup> Pb <sup>2+</sup>                                               | Cd <sup>2+</sup> and Pb <sup>2+</sup> : 0-3 μg·L <sup>-1</sup><br>Cu <sup>2+</sup> : 0-10 μg·L <sup>-1</sup> | Cd <sup>2+</sup> : 5.46 μA·<br>(μg·L <sup>-1</sup> ) <sup>-1</sup><br>Pb <sup>2+</sup> : 3.5 μA·<br>(μg·L <sup>-1</sup> ) <sup>-1</sup><br>Cu <sup>2+</sup> : 1.21 μA·<br>(μg·L <sup>-1</sup> ) <sup>-1</sup>           | [22] |
| MCPE graphite/alginate                               | 0.9 μg·L <sup>-1</sup> Cd <sup>2+</sup>                                                                                             | 0.0-30.0 μg·L <sup>-1</sup> Cd <sup>2+</sup>                                                                 | Cd <sup>2+</sup> : 0.931 μA·<br>(μg·L <sup>-1</sup> ) <sup>-1</sup>                                                                                                                                                     | [23] |
| Technique                                            | DL                                                                                                                                  | Ref                                                                                                          |                                                                                                                                                                                                                         |      |
| AAS                                                  | 1 ng·mL <sup>-1</sup> Cd<br>8 ng·mL <sup>-1</sup> Pb<br>2 ng·mL <sup>-1</sup> Cu                                                    | [10]                                                                                                         |                                                                                                                                                                                                                         |      |
| ICP-AES                                              | 0.007 ng·mL <sup>-1</sup> Cd<br>1 ng·mL <sup>-1</sup> Pb<br>0.04 ng·mL <sup>-1</sup> Cu                                             |                                                                                                              |                                                                                                                                                                                                                         |      |
| ICP-MS                                               | <10 ng·mL <sup>-1</sup> Cd<br><10 ng·mL <sup>-1</sup> Pb<br><10 ng·mL <sup>-1</sup> Cu                                              |                                                                                                              |                                                                                                                                                                                                                         |      |

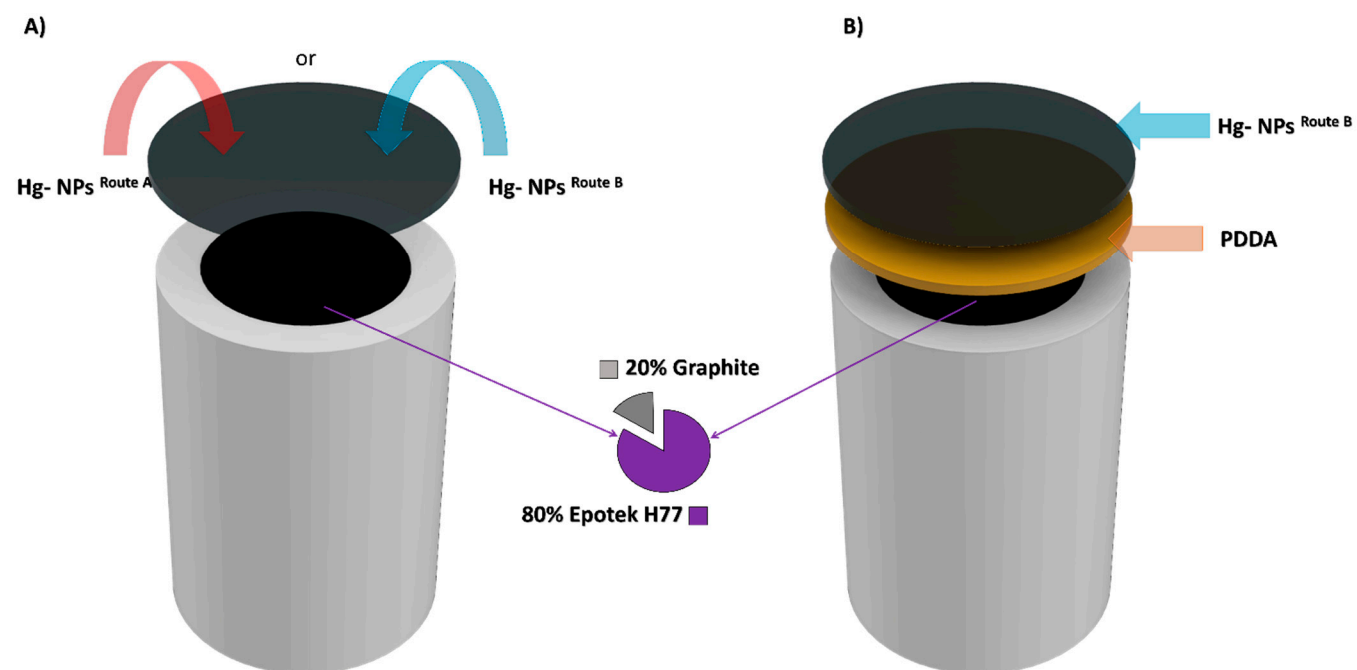

**Figure S1:** Scheme of the three types of electrodes.

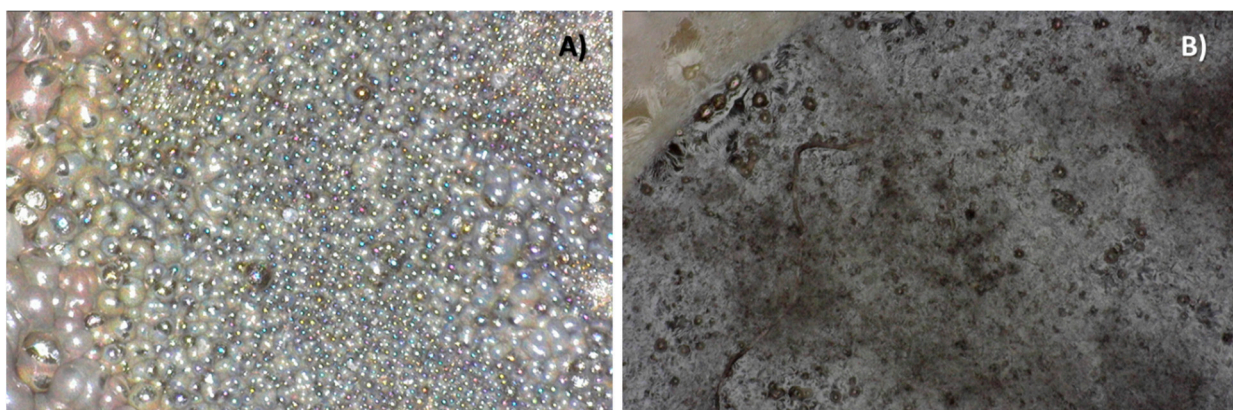

**Figure S2.** Using Dino-Lite Digital Microscope at 1:120 augments (A)  $\text{Hg-NPs}^{\text{Route B}}$  @graphite electrode surface, and (B)  $\text{Hg-NPs}^{\text{Route A}}$  @graphite electrode surface.

**Table S2:** Data obtained from the adjustment of two components in the XPS analysis. Calibration made by using C at 284.8 eV.

| Peak           | Position | % at conc | Raw area |
|----------------|----------|-----------|----------|
| Hg 4f $_{7/2}$ | 101.32   | 58.33     | 7207.41  |
| Hg 4f $_{5/2}$ | 105.35   | 41.67     | 5155.35  |

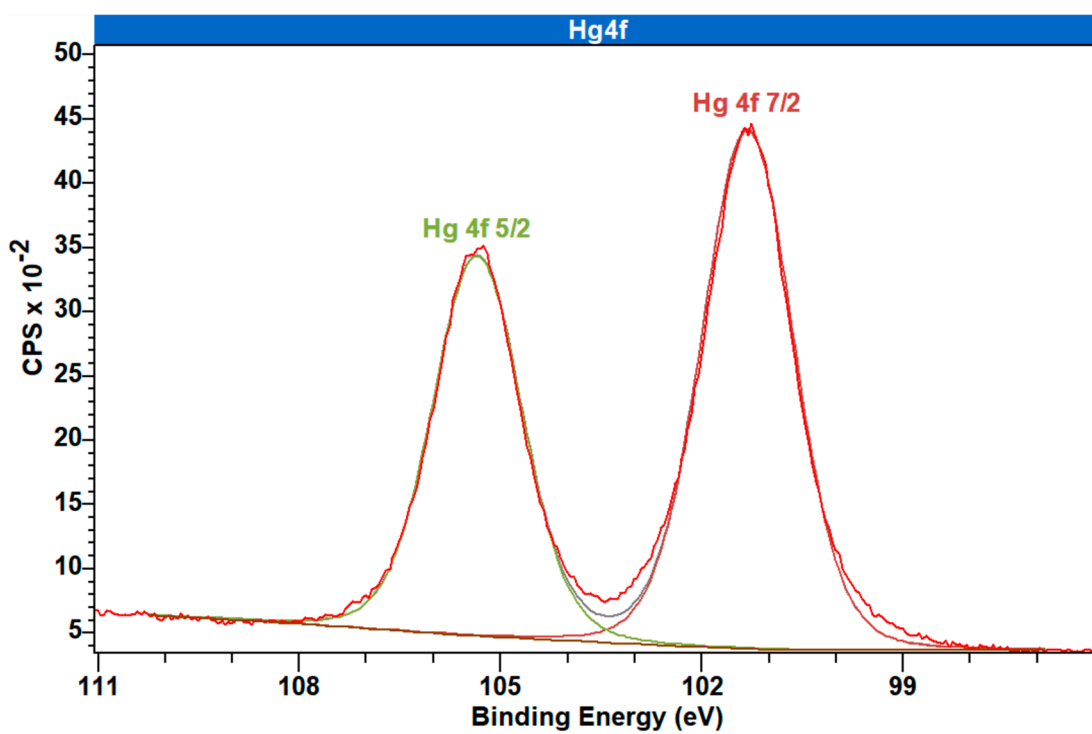

**Figure S3:** XPS analysis: adjustment for Hg 4f with two components: (green) for Hg 4f  $_{5/2}$  and (red) for Hg4f  $_{7/2}$ .

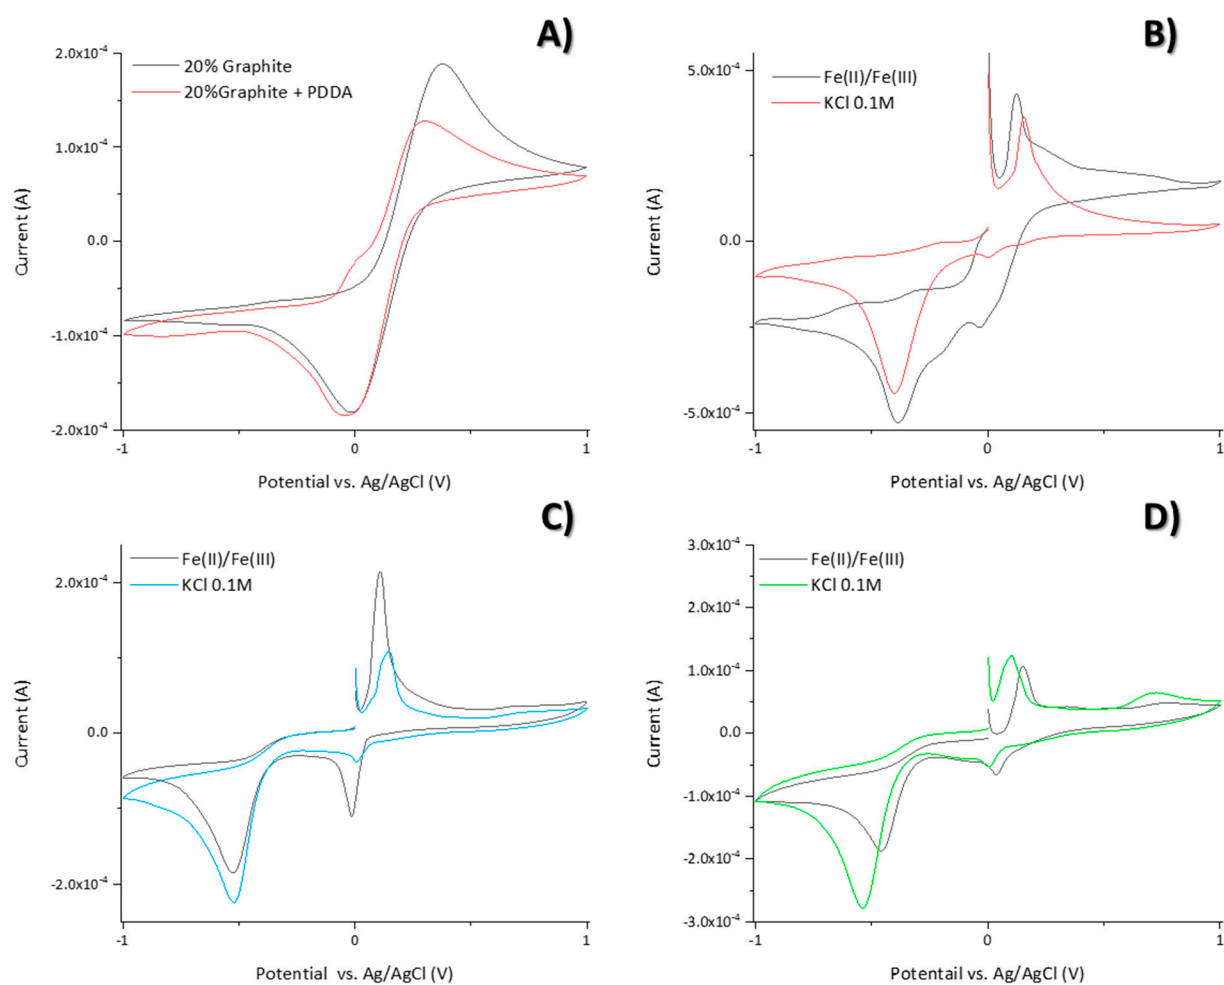

**Figure S4:** (A) CV using 0.01 M  $[\text{Fe}(\text{CN})_6]^{3-}/[\text{Fe}(\text{CN})_6]^{4-}$ , 0.1 M KCl with a 20% graphite electrode and 20% graphite electrode/PDDA. Comparison of the response in CV and in 0.01 M  $[\text{Fe}(\text{CN})_6]^{3-}/[\text{Fe}(\text{CN})_6]^{4-}$ , 0.1 M KCl and just 0.1 M KCl for (B) Hg-NPs<sup>Route A</sup> @graphite electrode; (C) Hg-NPs<sup>Route B</sup> @graphite electrode and (D) Hg-NPs<sup>Route B</sup>/PDPA @graphite electrode. Scan rate: 10 mV·s<sup>-1</sup>.

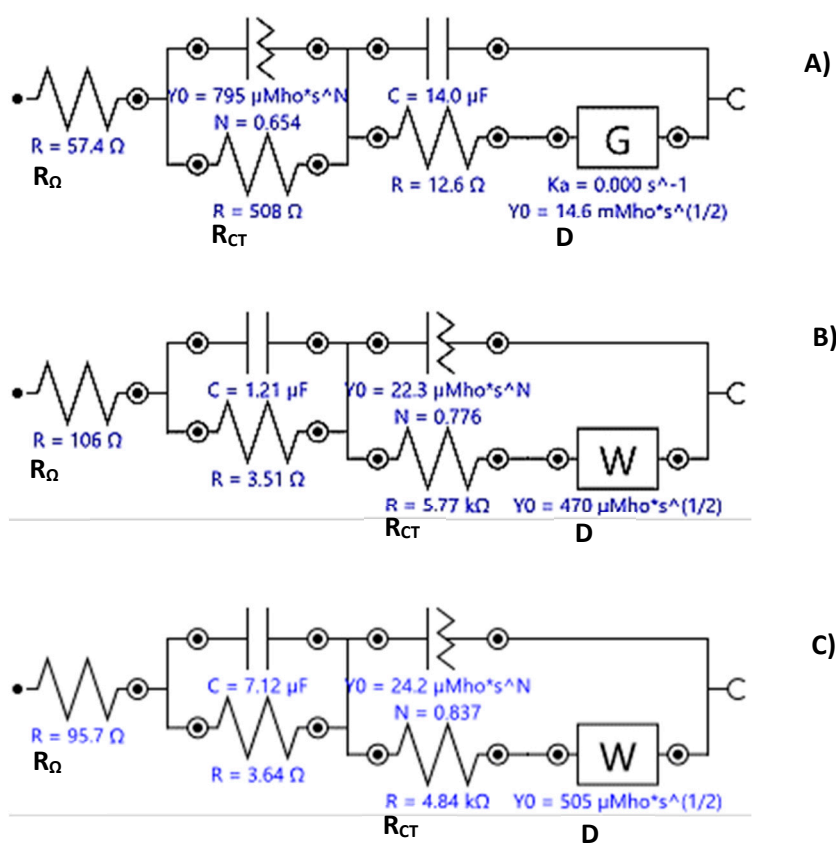

**Figure S5:** EIS adjusted circuits for: Hg-NPs<sup>Route A</sup>@graphite electrode (A); Hg-NPs<sup>Route B</sup>@graphite electrode (B); Hg-NPs<sup>Route B</sup>/PDDA@graphite electrode (C). Where  $R_{\Omega}$  is the ohmic resistance;  $R_{CT}$  is the charge transfer resistance and D is the diffusion element chosen (G: Gerischer, W: Warburg).

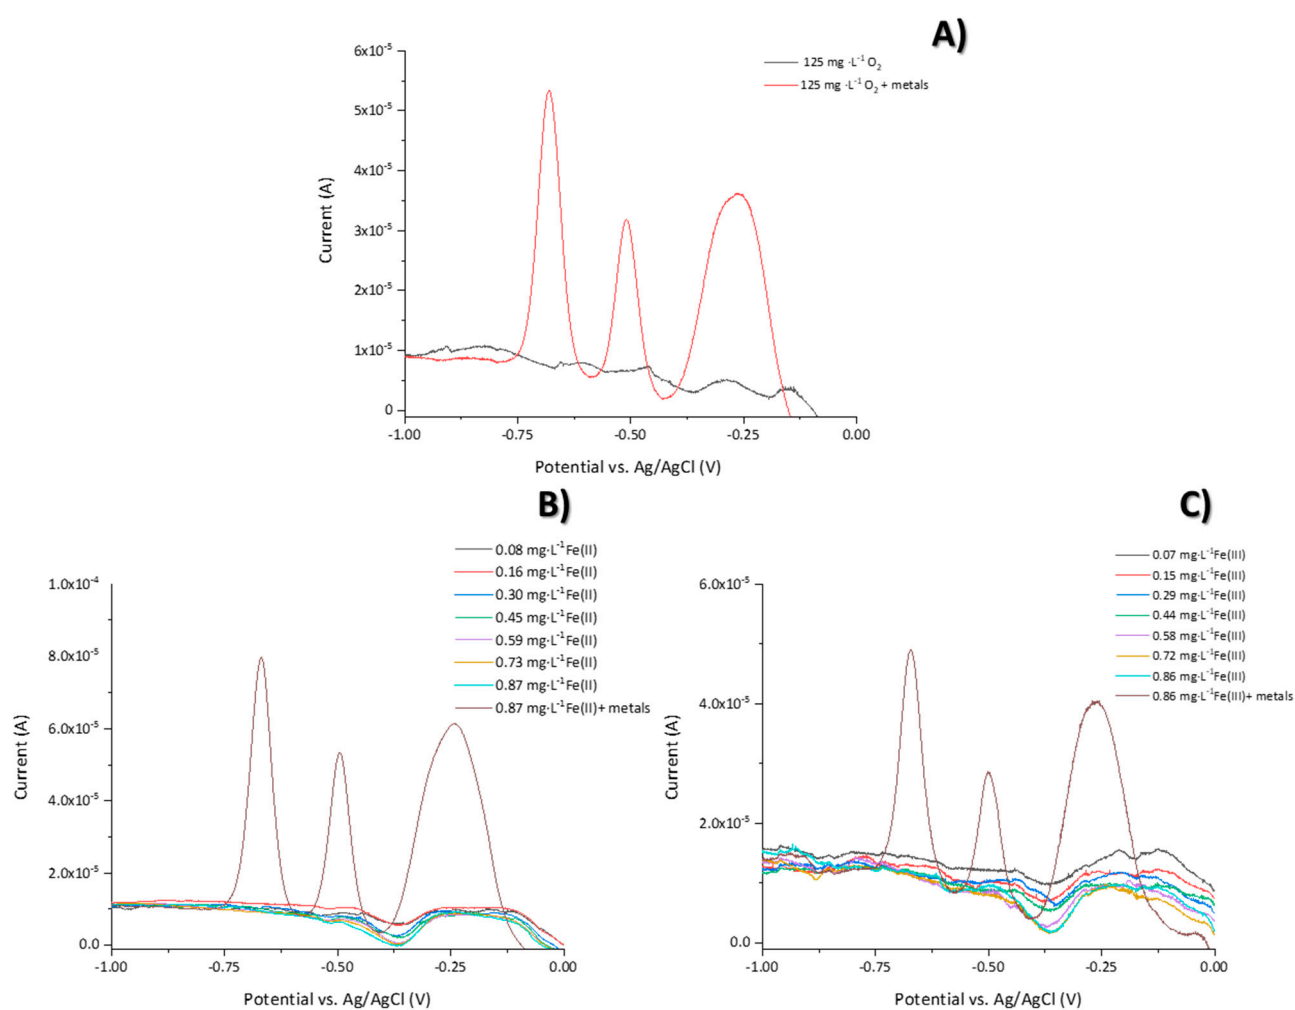

**Figure S6:** SWASV results of the addition for the interferences study: (A) dissolved organic matter; (B) Fe(II) and (C) Fe(III).
